# Supplementary material
Source: PubMed Central journal article supplement (PMC3092336)
Supplement: datasupp.pdf [file datasupp.pdf]

**Blood Gene Expression Signatures Associated with Heart Failure Outcomes- data supplement**

Peter VanBuren, MD; Jun Ma, PhD; Enkhtuyaa Mueller, MD;  
David Schneider, MD; Choong-Chin Liew, PhD

**Table 1** Genes Associated with Survival Time in Heart Failure Patients.

| Gene Title                                                 | Gene Symbol | Entrez Gene | Survival Analysis |          |                       | Ctrl vs NYHA I-II |             | Ctrl vs NYHA III-IV |             | Pathways |
|------------------------------------------------------------|-------------|-------------|-------------------|----------|-----------------------|-------------------|-------------|---------------------|-------------|----------|
|                                                            |             |             | p, longrank test  | q-value  | hr (95% CI)           | p                 | fold change | p                   | fold change |          |
| 5'-nucleotidase, ecto                                      | NT5E        | 4907        | 9.45E-05          | 4.39E-02 | 0.1 (0.1, 0.4)        | 3.1E-02           | 0.77        | 3.3E-04             | 0.62        |          |
| acidic repeat containing                                   | ACRC        | 93953       | 6.25E-05          | 3.94E-02 | 7.9 (2.7, 22.8)       | 7.6E-02           | 0.89        | 3.5E-01             | 1.13        |          |
| acyl-CoA synthetase family member 3                        | ACSF3       | 197322      | 2.43E-03          | 1.98E-01 | 6.4 (1.7, 25.0)       | 8.2E-01           | 1.00        | 5.3E-02             | 1.09        |          |
| adaptor-related protein complex 3, beta 1 subunit          | AP3B1       | 8546        | 1.34E-04          | 5.37E-02 | 18.4 (4.0, 85.0)      | 1.9E-01           | 1.05        | 5.3E-03             | 1.15        |          |
| adenylate kinase 5                                         | AK5         | 26289       | 1.42E-03          | 1.50E-01 | 0.1 (0.0, 0.4)        | 2.6E-01           | 1.06        | 4.8E-01             | 0.97        |          |
| alanine-glyoxylate aminotransferase 2-like 2               | AGXT2L2     | 85007       | 1.52E-03          | 1.56E-01 | 302.8 (10.4, 8,840.5) | 7.5E-01           | 1.00        | 5.8E-02             | 1.08        |          |
| amyloid beta precursor protein-binding, family A, member 2 | APBA2       | 321         | 9.95E-04          | 1.32E-01 | 0.1 (0.0, 0.5)        | 3.3E-02           | 0.88        | 6.7E-04             | 0.80        |          |
| ankylosis, progressive homolog                             | ANKH        | 56172       | 4.88E-04          | 9.94E-02 | 0.3 (0.1, 0.6)        | 4.8E-01           | 0.95        | 3.2E-04             | 0.70        |          |
| ankyrin 1, erythrocytic                                    | ANK1        | 286         | 1.31E-04          | 5.37E-02 | 3.9 (1.6, 9.2)        | 2.7E-01           | 0.98        | 3.0E-01             | 1.10        |          |
| ankyrin 3, node of Ranvier                                 | ANK3        | 288         | 5.28E-04          | 1.04E-01 | 0.4 (0.3, 0.7)        | 6.8E-01           | 0.91        | 7.5E-03             | 0.59        |          |
| AP2 associated kinase 1                                    | AAK1        | 22848       | 7.52E-04          | 1.21E-01 | 0.3 (0.1, 0.6)        | 4.2E-01           | 0.95        | 7.4E-05             | 0.76        |          |
| aquaporin 3                                                | AQP3        | 360         | 1.86E-05          | 2.26E-02 | 0.4 (0.2, 0.6)        | 9.2E-01           | 1.01        | 2.8E-02             | 0.68        |          |
| ATPase, class V, type 10A                                  | ATP10A      | 57194       | 1.75E-03          | 1.69E-01 | 0.2 (0.1, 0.6)        | 8.1E-01           | 1.00        | 1.8E-02             | 0.87        |          |

|                                                  |          |        |          |          |                   |         |      |         |      |             |
|--------------------------------------------------|----------|--------|----------|----------|-------------------|---------|------|---------|------|-------------|
| B-cell CLL/lymphoma 11B                          | BCL11B   | 64919  | 1.97E-03 | 1.81E-01 | 0.4 (0.3, 0.8)    | 6.3E-01 | 0.89 | 3.3E-03 | 0.59 |             |
| Bcl2 modifying factor                            | BMF      | 90427  | 4.27E-04 | 9.19E-02 | 2.7 (1.5, 4.9)    | 1.5E-01 | 1.10 | 2.4E-02 | 1.33 |             |
| BRCA2 and CDKN1A interacting protein             | BCCIP    | 56647  | 1.49E-03 | 1.55E-01 | 11.7 (2.5, 55.8)  | 6.0E-02 | 1.09 | 2.8E-02 | 1.13 |             |
| Bruton agammaglobulinemia tyrosine kinase        | BTK      | 695    | 1.40E-04 | 5.45E-02 | 14.5 (3.7, 57.3)  | 8.3E-02 | 1.11 | 1.1E-03 | 1.29 | 1, 2, 3, 7  |
| BTB domain containing 11                         | BTBD11   | 121551 | 4.37E-05 | 3.40E-02 | 0.4 (0.3, 0.6)    | 3.6E-01 | 0.83 | 9.3E-03 | 0.61 |             |
| calmodulin 1                                     | CALM1    | 801    | 2.42E-03 | 1.98E-01 | 0.1 (0.0, 0.4)    | 2.3E-02 | 0.88 | 1.1E-03 | 0.83 | 1, 7, 9, 11 |
| cannabinoid receptor 2                           | CNR2     | 1269   | 2.17E-04 | 6.61E-02 | 4.2 (1.9, 9.2)    | 2.0E-01 | 1.09 | 2.8E-01 | 1.19 |             |
| carbonyl reductase 3                             | CBR3     | 874    | 2.29E-04 | 6.73E-02 | 0.1 (0.0, 0.3)    | 3.4E-01 | 1.09 | 1.5E-01 | 0.93 |             |
| casein kinase 1, epsilon                         | CSNK1E   | 1454   | 1.19E-03 | 1.40E-01 | 6.6 (2.0, 21.4)   | 8.0E-01 | 1.02 | 2.9E-01 | 1.10 |             |
| cathepsin K                                      | CTSK     | 1513   | 2.86E-04 | 7.75E-02 | 29.5 (4.7, 185.3) | 5.9E-01 | 1.05 | 3.6E-02 | 1.18 |             |
| CD200 receptor 1                                 | CD200R1  | 131450 | 6.17E-04 | 1.09E-01 | 0.1 (0.0, 0.3)    | 6.4E-02 | 1.13 | 1.7E-01 | 0.94 |             |
| CD22 molecule                                    | CD22     | 933    | 2.25E-03 | 1.93E-01 | 21.6 (2.3, 207.3) | 3.5E-01 | 0.96 | 8.8E-01 | 0.99 | 7           |
| CD28 molecule                                    | CD28     | 940    | 8.63E-05 | 4.23E-02 | 0.5 (0.3, 0.7)    | 8.5E-01 | 1.01 | 1.5E-02 | 0.58 | 1           |
| CD3d molecule, delta                             | CD3D     | 915    | 1.66E-03 | 1.63E-01 | 0.3 (0.2, 0.7)    | 5.9E-01 | 0.95 | 7.1E-03 | 0.75 | 1, 8        |
| CD3e molecule, epsilon                           | CD3E     | 916    | 7.88E-04 | 1.23E-01 | 0.3 (0.2, 0.6)    | 7.9E-01 | 0.96 | 1.5E-03 | 0.68 | 1, 8        |
| CD3g molecule, gamma                             | CD3G     | 917    | 2.00E-03 | 1.81E-01 | 0.4 (0.2, 0.7)    | 4.8E-01 | 0.90 | 3.4E-03 | 0.68 | 1, 8        |
| CD7 molecule                                     | CD7      | 924    | 9.90E-04 | 1.32E-01 | 0.3 (0.2, 0.7)    | 9.0E-02 | 0.82 | 1.3E-03 | 0.67 |             |
| CDC14 cell division cycle 14 homolog A           | CDC14A   | 8556   | 1.30E-03 | 1.45E-01 | 0.2 (0.1, 0.5)    | 4.2E-01 | 1.08 | 1.5E-03 | 0.77 |             |
| cerebellar degeneration-related protein 2, 62kDa | CDR2     | 1039   | 2.32E-03 | 1.94E-01 | 0.2 (0.1, 0.6)    | 8.7E-01 | 1.03 | 4.3E-03 | 0.78 |             |
| choline kinase alpha                             | CHKA     | 1119   | 9.74E-04 | 1.32E-01 | 19.8 (3.4, 115.1) | 3.5E-01 | 1.05 | 8.2E-02 | 1.12 |             |
| chromosome 1 open reading frame 113              | C1orf113 | 79729  | 9.52E-04 | 1.32E-01 | 5.5 (1.8, 16.7)   | 7.8E-02 | 1.07 | 4.5E-02 | 1.10 |             |
| chromosome 10 open reading frame 58              | C10orf58 | 84293  | 1.55E-03 | 1.56E-01 | 0.2 (0.1, 0.6)    | 5.7E-01 | 1.03 | 3.5E-02 | 0.87 |             |
| chromosome 14 open reading frame 64              | C14orf64 | 388011 | 5.90E-04 | 1.07E-01 | 0.3 (0.1, 0.6)    | 7.6E-01 | 0.94 | 4.1E-04 | 0.59 |             |
| chromosome 17 open reading frame 56              | C17orf56 | 146705 | 1.40E-03 | 1.49E-01 | 47.8 (4.3, 528.3) | 3.6E-01 | 0.94 | 6.8E-01 | 1.02 |             |
| Chromosome 18 open reading frame 50              | C18orf50 | 619463 | 1.81E-03 | 1.73E-01 | 0.4 (0.2, 0.7)    | 7.8E-01 | 0.93 | 3.2E-02 | 0.71 |             |
| chromosome 20 open reading frame 72              | C20orf72 | 92667  | 5.77E-05 | 3.82E-02 | 24.7 (5.8, 105.8) | 9.4E-01 | 1.02 | 1.8E-01 | 1.11 |             |
| Chromosome 3 open reading frame 37               | C3orf37  | 56941  | 2.25E-04 | 6.70E-02 | 0.1 (0.0, 0.3)    | 1.4E-01 | 0.90 | 1.0E-03 | 0.77 |             |
| chromosome 4 open reading frame 34               | C4orf34  | 201895 | 1.72E-05 | 2.26E-02 | 4.3 (2.0, 9.4)    | 1.3E-01 | 0.95 | 2.3E-01 | 1.20 |             |
| chromosome 9 open reading frame 52               | C9orf52  | 158219 | 1.98E-03 | 1.81E-01 | 0.1 (0.0, 0.5)    | 3.7E-01 | 0.92 | 2.7E-02 | 0.83 |             |
| coiled-coil domain containing 104                | CCDC104  | 112942 | 8.43E-04 | 1.26E-01 | 0.3 (0.2, 0.6)    | 9.2E-01 | 0.99 | 3.9E-03 | 0.71 |             |
| coiled-coil domain containing 65                 | CCDC65   | 85478  | 2.13E-03 | 1.86E-01 | 0.2 (0.1, 0.5)    | 3.7E-01 | 1.08 | 3.7E-02 | 0.87 |             |

|                                                                       |          |        |          |          |                   |         |      |         |      |   |
|-----------------------------------------------------------------------|----------|--------|----------|----------|-------------------|---------|------|---------|------|---|
| coiled-coil domain containing 88A                                     | CCDC88A  | 55704  | 9.84E-05 | 4.49E-02 | 4.3 (2.1, 8.8)    | 3.4E-02 | 1.24 | 6.0E-04 | 1.65 |   |
| cold shock domain protein A                                           | CSDA     | 8531   | 5.63E-04 | 1.04E-01 | 2.6 (1.5, 4.4)    | 7.7E-01 | 0.98 | 1.1E-02 | 1.60 |   |
| core-binding factor, runt domain, alpha subunit 2; translocated to, 3 | CBFA2T3  | 863    | 4.47E-04 | 9.46E-02 | 12.0 (2.8, 51.3)  | 5.7E-01 | 1.04 | 3.5E-02 | 1.20 |   |
| cryptochrome 1                                                        | CRY1     | 1407   | 3.43E-04 | 8.25E-02 | 0.4 (0.2, 0.7)    | 1.7E-01 | 0.92 | 7.5E-05 | 0.72 |   |
| cyclin-dependent kinase 2                                             | CDK2     | 1017   | 1.55E-04 | 5.64E-02 | 0.0 (0.0, 0.1)    | 3.1E-01 | 0.95 | 1.7E-01 | 0.94 | 6 |
| cyclin-dependent kinase inhibitor 2A                                  | CDKN2A   | 1029   | 1.55E-04 | 5.64E-02 | 8.8 (2.5, 30.6)   | 1.4E-01 | 1.04 | 2.0E-02 | 1.12 | 6 |
| cyclin-dependent kinase-like 3                                        | CDKL3    | 51265  | 9.96E-04 | 1.32E-01 | 7.9 (2.2, 28.8)   | 5.9E-01 | 1.03 | 7.9E-01 | 1.05 |   |
| cytochrome P450, family 2, subfamily B, polypeptide 7 pseudogene 1    | CYP2B7P1 | 1556   | 9.71E-04 | 1.32E-01 | 0.0 (0.0, 0.2)    | 7.1E-01 | 1.01 | 8.1E-01 | 1.00 |   |
| DCN1, defective in cullin neddylation 1, domain containing 4          | DCUN1D4  | 23142  | 2.06E-03 | 1.84E-01 | 0.1 (0.0, 0.4)    | 4.7E-01 | 0.96 | 9.7E-02 | 0.90 |   |
| dedicator of cytokinesis 9                                            | DOCK9    | 23348  | 1.63E-03 | 1.61E-01 | 0.3 (0.1, 0.7)    | 3.7E-01 | 0.93 | 8.7E-05 | 0.64 |   |
| dehydrogenase E1 and transketolase domain containing 1                | DHTKD1   | 55526  | 2.29E-03 | 1.94E-01 | 36.6 (3.4, 396.4) | 6.9E-01 | 0.98 | 9.7E-01 | 1.01 |   |
| dehydrogenase/reductase member 3                                      | DHRS3    | 9249   | 2.70E-04 | 7.52E-02 | 0.2 (0.1, 0.5)    | 4.7E-01 | 0.94 | 9.0E-03 | 0.79 |   |
| DIP2 disco-interacting protein 2 homolog C                            | DIP2C    | 22982  | 6.94E-05 | 4.00E-02 | 9.3 (2.2, 38.5)   | 9.1E-01 | 1.00 | 4.1E-01 | 1.06 |   |
| dipeptidyl-peptidase 4                                                | DPP4     | 1803   | 2.57E-05 | 2.52E-02 | 0.3 (0.2, 0.5)    | 7.0E-01 | 1.06 | 2.7E-03 | 0.78 |   |
| dynamin binding protein                                               | DNMBP    | 23268  | 3.36E-06 | 8.09E-03 | 3.3 (1.9, 5.7)    | 9.3E-01 | 1.01 | 1.0E-01 | 1.32 |   |
| EGFR-coamplified and overexpressed protein                            | ECOP     | 81552  | 2.88E-04 | 7.75E-02 | 3.5 (1.7, 7.1)    | 9.4E-01 | 1.00 | 5.4E-02 | 1.25 |   |
| EPH receptor A1                                                       | EPHA1    | 2041   | 4.69E-05 | 3.53E-02 | 0.1 (0.0, 0.3)    | 3.9E-01 | 1.03 | 3.2E-02 | 0.94 |   |
| Epstein-Barr virus induced gene 2                                     | EBI2     | 1880   | 1.35E-03 | 1.46E-01 | 0.3 (0.2, 0.7)    | 8.4E-01 | 1.00 | 4.2E-03 | 0.66 |   |
| family with sequence similarity 134, member B                         | FAM134B  | 54463  | 1.88E-05 | 2.26E-02 | 0.2 (0.1, 0.4)    | 2.1E-01 | 0.93 | 1.0E-04 | 0.73 |   |
| family with sequence similarity 65, member A                          | FAM65A   | 79567  | 1.22E-03 | 1.41E-01 | 41.1 (4.5, 378.5) | 2.3E-01 | 1.06 | 1.4E-03 | 1.18 |   |
| family with sequence similarity 84, member B                          | FAM84B   | 157638 | 3.36E-04 | 8.25E-02 | 0.4 (0.2, 0.7)    | 3.0E-02 | 0.82 | 5.9E-07 | 0.56 |   |
| FGFR1 oncogene partner 2                                              | FGFR1OP2 | 26127  | 2.33E-03 | 1.94E-01 | 0.0 (0.0, 0.2)    | 9.0E-01 | 1.00 | 2.1E-02 | 0.92 |   |
| fragile histidine triad gene                                          | FHIT     | 2272   | 1.63E-03 | 1.61E-01 | 0.6 (0.4, 0.8)    | 6.6E-01 | 0.91 | 2.3E-02 | 0.61 |   |
| G protein-coupled receptor kinase interactor 2                        | GIT2     | 9815   | 1.15E-03 | 1.37E-01 | 52.3 (4.4, 619.7) | 2.9E-01 | 0.94 | 9.3E-02 | 1.09 |   |
| galactose-3-O-sulfotransferase 4                                      | GAL3ST4  | 79690  | 1.08E-03 | 1.36E-01 | 0.0 (0.0, 0.3)    | 7.7E-01 | 1.02 | 3.4E-02 | 0.91 |   |
| gametocyte specific factor 1                                          | GTSF1    | 121355 | 8.07E-05 | 4.19E-02 | 4.8 (2.1, 11.1)   | 3.1E-01 | 1.07 | 8.5E-02 | 1.26 |   |
| gametocyte specific factor 1-like                                     | GTSF1L   | 149699 | 5.04E-04 | 1.00E-01 | 4.7 (1.9, 11.3)   | 9.2E-01 | 0.98 | 4.0E-01 | 1.15 |   |
| GATA binding protein 3                                                | GATA3    | 2625   | 1.32E-03 | 1.45E-01 | 0.4 (0.2, 0.7)    | 4.6E-01 | 0.93 | 5.1E-05 | 0.55 |   |
| glycosyltransferase 25 domain containing 1                            | GLT25D1  | 79709  | 5.68E-04 | 1.04E-01 | 25.9 (4.2, 160.0) | 3.9E-01 | 1.04 | 1.3E-04 | 1.17 |   |

|                                               |           |        |          |          |                           |         |      |         |      |         |
|-----------------------------------------------|-----------|--------|----------|----------|---------------------------|---------|------|---------|------|---------|
| GrpE-like 2, mitochondrial                    | GRPEL2    | 134266 | 2.34E-03 | 1.94E-01 | 0.2 (0.0, 0.5)            | 9.5E-01 | 1.01 | 4.9E-01 | 0.95 |         |
| HEAT repeat containing 6                      | HEATR6    | 63897  | 4.40E-04 | 9.40E-02 | 6.8 (2.0, 22.5)           | 5.4E-01 | 0.98 | 2.2E-01 | 1.09 |         |
| Heat shock 70kDa protein 4                    | HSPA4     | 3308   | 4.64E-04 | 9.67E-02 | 2.9 (1.5, 5.7)            | 9.1E-01 | 1.00 | 7.1E-02 | 1.29 | 8       |
| heat shock transcription factor 2             | HSF2      | 3298   | 3.64E-04 | 8.66E-02 | 0.2 (0.1, 0.4)            | 1.0E-01 | 0.88 | 2.8E-04 | 0.72 |         |
| HERPUD family member 2                        | HERPUD2   | 64224  | 2.07E-03 | 1.84E-01 | 0.0 (0.0, 0.2)            | 2.4E-01 | 0.95 | 4.1E-03 | 0.87 |         |
| hypothetical gene supported by AY007155       | LOC439949 | 439949 | 1.48E-04 | 5.60E-02 | 0.4 (0.3, 0.7)            | 8.7E-01 | 1.00 | 6.1E-03 | 0.67 |         |
| hypothetical protein FLJ25791                 | FLJ25791  | 222521 | 7.39E-04 | 1.20E-01 | 7.2 (2.1, 24.2)           | 9.1E-01 | 1.01 | 2.0E-01 | 1.07 |         |
| hypothetical protein LOC129293                | LOC129293 | 129293 | 9.47E-04 | 1.32E-01 | 0.4 (0.2, 0.7)            | 6.9E-01 | 0.88 | 1.3E-02 | 0.60 |         |
| hypothetical protein LOC641518                | LOC641518 | 641518 | 3.11E-05 | 2.84E-02 | 0.0 (0.0, 0.2)            | 7.3E-01 | 0.98 | 8.8E-03 | 0.77 |         |
| IL2-inducible T-cell kinase                   | ITK       | 3702   | 5.47E-04 | 1.04E-01 | 0.3 (0.2, 0.6)            | 9.7E-01 | 1.00 | 2.9E-03 | 0.71 | 1, 3    |
| inositol 1,4,5-triphosphate receptor, type 2  | ITPR2     | 3709   | 1.52E-03 | 1.56E-01 | 38.6 (3.9, 379.0)         | 3.0E-02 | 1.12 | 1.8E-02 | 1.12 | 9       |
| Integrator complex subunit 9                  | INTS9     | 55756  | 7.51E-04 | 1.21E-01 | 97.5 (6.7, 1,428.0)       | 6.5E-02 | 1.05 | 9.8E-03 | 1.09 |         |
| integrin, alpha 4                             | ITGA4     | 3676   | 9.70E-04 | 1.32E-01 | 0.2 (0.1, 0.5)            | 2.3E-01 | 1.10 | 7.5E-01 | 0.98 | 3       |
| integrin, alpha 6                             | ITGA6     | 3655   | 1.63E-04 | 5.69E-02 | 0.3 (0.1, 0.5)            | 5.7E-01 | 0.96 | 1.3E-04 | 0.64 |         |
| Interferon, alpha-inducible protein 6         | IFI6      | 2537   | 3.96E-04 | 9.00E-02 | 0.3 (0.2, 0.6)            | 2.1E-02 | 0.71 | 5.8E-03 | 0.73 |         |
| interleukin 23, alpha subunit p19             | IL23A     | 51561  | 1.71E-03 | 1.66E-01 | 0.1 (0.0, 0.4)            | 1.8E-01 | 0.62 | 2.0E-02 | 0.49 |         |
| interleukin 7 receptor                        | IL7R      | 3575   | 8.62E-05 | 4.23E-02 | 0.4 (0.2, 0.6)            | 9.5E-01 | 1.00 | 2.0E-03 | 0.68 |         |
| KIAA0040                                      | KIAA0040  | 9674   | 2.33E-03 | 1.94E-01 | 6.0 (1.8, 19.8)           | 3.7E-01 | 0.93 | 5.2E-02 | 1.20 |         |
| KIAA0888                                      | KIAA0888  | 26049  | 1.32E-03 | 1.45E-01 | 0.4 (0.2, 0.7)            | 1.1E-01 | 0.85 | 1.6E-05 | 0.57 |         |
| KIAA0922                                      | KIAA0922  | 23240  | 1.32E-04 | 5.37E-02 | 31.3 (5.3, 186.4)         | 8.8E-01 | 1.00 | 4.9E-01 | 1.05 |         |
| KIAA1012                                      | KIAA1012  | 22878  | 1.86E-03 | 1.75E-01 | 1,778.2 (17.6, 179,866.3) | 6.5E-01 | 0.99 | 5.4E-01 | 1.02 |         |
| KIAA1407                                      | KIAA1407  | 57577  | 6.42E-04 | 1.11E-01 | 1.9 (1.2, 2.8)            | 1.4E-01 | 1.08 | 3.5E-01 | 1.54 |         |
| lactate dehydrogenase B                       | LDHB      | 3945   | 1.28E-03 | 1.45E-01 | 0.2 (0.1, 0.6)            | 9.8E-01 | 0.99 | 2.5E-02 | 0.79 |         |
| latrophilin 1                                 | LPHN1     | 22859  | 4.59E-06 | 9.35E-03 | 0.1 (0.0, 0.2)            | 2.1E-01 | 1.07 | 4.0E-03 | 0.87 |         |
| leptin receptor overlapping transcript-like 1 | LEPROTL1  | 23484  | 7.03E-04 | 1.17E-01 | 0.1 (0.0, 0.4)            | 3.0E-01 | 0.92 | 5.9E-03 | 0.79 |         |
| leucine rich repeat neuronal 3                | LRRN3     | 54674  | 1.35E-03 | 1.46E-01 | 0.5 (0.3, 0.8)            | 8.5E-01 | 1.33 | 7.9E-03 | 0.57 |         |
| LIM domain only 4                             | LMO4      | 8543   | 1.13E-03 | 1.37E-01 | 16.3 (3.1, 86.7)          | 9.2E-01 | 1.02 | 9.5E-04 | 1.21 |         |
| linker for activation of T cells              | LAT       | 27040  | 8.25E-04 | 1.26E-01 | 0.2 (0.1, 0.5)            | 4.9E-01 | 0.96 | 1.7E-03 | 0.77 | 1, 2, 4 |
| lipin 2                                       | LPIN2     | 9663   | 1.99E-03 | 1.81E-01 | 0.1 (0.0, 0.5)            | 3.0E-01 | 0.93 | 3.2E-02 | 0.86 |         |
| Lix1 homolog-like                             | LIX1L     | 128077 | 6.08E-04 | 1.09E-01 | 0.3 (0.2, 0.6)            | 2.7E-01 | 0.92 | 4.3E-01 | 0.97 |         |

|                                                                                        |          |        |          |          |                           |         |      |         |      |                       |
|----------------------------------------------------------------------------------------|----------|--------|----------|----------|---------------------------|---------|------|---------|------|-----------------------|
| low density lipoprotein receptor adaptor protein 1                                     | LDLRAP1  | 26119  | 7.74E-04 | 1.23E-01 | 0.3 (0.1, 0.6)            | 3.0E-01 | 0.89 | 1.8E-03 | 0.65 |                       |
| low density lipoprotein receptor-related protein 5-like                                | LRP5L    | 91355  | 2.01E-04 | 6.26E-02 | 6.4 (2.0, 20.3)           | 7.3E-01 | 0.99 | 8.1E-02 | 1.13 |                       |
| lysosomal associated multispinning membrane protein 5                                  | LAPTM5   | 7805   | 1.70E-03 | 1.66E-01 | 3,553.7 (22.8, 554,931.3) | 9.9E-01 | 1.00 | 1.4E-02 | 1.05 |                       |
| mal, T-cell differentiation protein                                                    | MAL      | 4118   | 4.01E-04 | 9.00E-02 | 0.5 (0.4, 0.8)            | 9.2E-01 | 0.97 | 1.1E-01 | 0.71 |                       |
| mannosidase, alpha, class 1C, member 1                                                 | MAN1C1   | 57134  | 9.87E-04 | 1.32E-01 | 0.5 (0.4, 0.8)            | 1.0E+00 | 0.90 | 1.6E-01 | 0.66 |                       |
| mannosyl (alpha-1,3-)-glycoprotein beta-1,4-N-acetylglucosaminyltransferase, isozyme A | MGAT4A   | 11320  | 6.45E-05 | 3.97E-02 | 0.2 (0.1, 0.5)            | 2.2E-01 | 0.93 | 2.2E-04 | 0.76 |                       |
| mitogen-activated protein kinase 8 interacting protein 3                               | MAPK8IP3 | 23162  | 9.37E-04 | 1.32E-01 | 108.3 (6.5, 1,816.3)      | 6.9E-01 | 1.02 | 3.3E-01 | 1.05 |                       |
| mucolin 2                                                                              | MCOLN2   | 255231 | 6.79E-04 | 1.15E-01 | 1.8 (1.2, 2.7)            | 4.4E-01 | 0.89 | 5.1E-01 | 1.59 |                       |
| myeloid/lymphoid or mixed-lineage leukemia; translocated to, 3                         | MLLT3    | 4300   | 8.50E-05 | 4.23E-02 | 0.2 (0.1, 0.5)            | 7.6E-01 | 0.98 | 2.7E-03 | 0.69 |                       |
| NEL-like 2                                                                             | NELL2    | 4753   | 1.15E-04 | 4.98E-02 | 0.4 (0.2, 0.7)            | 7.1E-01 | 0.91 | 3.4E-03 | 0.57 |                       |
| neuronal pentraxin 1                                                                   | NPTX1    | 4884   | 1.73E-06 | 5.09E-03 | 2.7 (1.5, 4.9)            | 6.5E-01 | 1.02 | 2.5E-01 | 1.44 |                       |
| N-myristoyltransferase 2                                                               | NMT2     | 9397   | 5.36E-04 | 1.04E-01 | 0.5 (0.3, 0.7)            | 6.4E-01 | 0.94 | 2.8E-04 | 0.55 |                       |
| nuclear receptor coactivator 3                                                         | NCOA3    | 8202   | 8.34E-04 | 1.26E-01 | 5.0 (1.7, 14.4)           | 4.4E-01 | 0.98 | 5.3E-01 | 1.07 | 8                     |
| nuclear receptor subfamily 3, group C, member 2                                        | NR3C2    | 4306   | 5.28E-04 | 1.04E-01 | 0.3 (0.1, 0.6)            | 1.7E-01 | 0.82 | 4.8E-05 | 0.50 |                       |
| nucleosome assembly protein 1-like 3                                                   | NAP1L3   | 4675   | 5.59E-04 | 1.04E-01 | 0.4 (0.2, 0.7)            | 1.9E-01 | 0.84 | 9.7E-04 | 0.60 |                       |
| oxidoreductase NAD-binding domain containing 1                                         | OXNAD1   | 92106  | 3.37E-04 | 8.25E-02 | 0.2 (0.1, 0.5)            | 7.5E-01 | 0.98 | 2.3E-02 | 0.79 |                       |
| phosphatidylinositol transfer protein, cytoplasmic 1                                   | PITPNC1  | 26207  | 2.24E-03 | 1.92E-01 | 0.4 (0.2, 0.8)            | 2.1E-01 | 0.90 | 4.9E-04 | 0.70 |                       |
| phosphodiesterase 3B, cGMP-inhibited                                                   | PDE3B    | 5140   | 2.22E-04 | 6.67E-02 | 0.3 (0.2, 0.6)            | 2.5E-03 | 0.80 | 7.9E-05 | 0.72 |                       |
| Phosphoglucomutase 2-like 1                                                            | PGM2L1   | 283209 | 1.83E-03 | 1.74E-01 | 0.0 (0.0, 0.2)            | 2.9E-01 | 1.03 | 3.3E-01 | 0.98 |                       |
| phospholipase C, gamma 2                                                               | PLCG2    | 5336   | 8.92E-04 | 1.31E-01 | 27.7 (4.0, 191.5)         | 1.5E-01 | 0.94 | 3.0E-01 | 1.06 | 2, 3, 4, 5, 7, 10, 11 |
| phospholysine phosphohistidine inorganic pyrophosphate phosphatase                     | LHPP     | 64077  | 1.55E-03 | 1.56E-01 | 12.7 (3.0, 53.5)          | 2.9E-01 | 1.06 | 5.7E-01 | 1.06 |                       |
| pleckstrin homology domain containing, family A member 2                               | PLEKHA2  | 59339  | 1.52E-04 | 5.64E-02 | 6.0 (2.1, 17.2)           | 3.9E-01 | 0.97 | 2.7E-01 | 1.11 |                       |
| poly(A) binding protein, cytoplasmic 1-like                                            | PABPC1L  | 80336  | 5.94E-04 | 1.07E-01 | 9.7 (2.6, 36.0)           | 4.9E-01 | 1.05 | 2.1E-02 | 1.29 |                       |
| PR domain containing 2, with ZNF domain                                                | PRDM2    | 7799   | 1.73E-04 | 5.77E-02 | 12.0 (3.2, 45.2)          | 6.1E-02 | 0.93 | 5.8E-01 | 0.99 |                       |
| prickle homolog 1                                                                      | PRICKLE1 | 144165 | 2.11E-03 | 1.85E-01 | 2.6 (1.4, 4.7)            | 6.3E-02 | 1.12 | 2.7E-01 | 1.45 |                       |
| programmed cell death 4                                                                | PDCD4    | 27250  | 1.47E-03 | 1.54E-01 | 0.1 (0.0, 0.4)            | 4.1E-02 | 0.88 | 1.8E-03 | 0.81 |                       |
| Proprotein convertase subtilisin/kexin type 5                                          | PCSK5    | 5125   | 4.14E-04 | 9.00E-02 | 0.2 (0.1, 0.5)            | 5.4E-01 | 1.06 | 9.3E-01 | 1.02 |                       |

|                                                                                           |          |        |          |          |                   |         |      |         |      |                          |
|-------------------------------------------------------------------------------------------|----------|--------|----------|----------|-------------------|---------|------|---------|------|--------------------------|
| protein inhibitor of activated STAT, 2                                                    | PIAS2    | 9063   | 9.93E-04 | 1.32E-01 | 2.3 (1.3, 3.8)    | 3.6E-01 | 0.81 | 1.7E-01 | 1.31 |                          |
| protein inhibitor of activated STAT, 2                                                    | PIAS2    | 9063   | 1.04E-03 | 1.35E-01 | 2.4 (1.4, 4.3)    | 1.4E-01 | 0.77 | 1.7E-01 | 1.30 |                          |
| protein kinase C, alpha                                                                   | PRKCA    | 5578   | 1.52E-03 | 1.56E-01 | 0.4 (0.2, 0.7)    | 9.1E-01 | 0.98 | 6.2E-02 | 0.74 | 2, 3, 4, 5, 9, 10, 11    |
| protein kinase C, beta 1                                                                  | PRKCB1   | 5579   | 1.45E-05 | 2.26E-02 | 29.1 (7.3, 117.0) | 4.2E-01 | 1.04 | 3.6E-01 | 1.08 | 2, 3, 4, 5, 7, 9, 10, 11 |
| protein kinase C, eta                                                                     | PRKCH    | 5583   | 6.39E-04 | 1.11E-01 | 0.2 (0.1, 0.5)    | 6.2E-02 | 0.91 | 7.3E-04 | 0.82 | 2, 3, 4, 5, 9            |
| protein tyrosine phosphatase, non-receptor type 2                                         | PTPN2    | 5771   | 3.35E-04 | 8.25E-02 | 18.0 (3.7, 86.9)  | 8.3E-02 | 1.06 | 5.0E-03 | 1.15 |                          |
| PRP18 pre-mRNA processing factor 18 homolog                                               | PRPF18   | 8559   | 1.73E-03 | 1.68E-01 | 12.2 (2.6, 57.4)  | 7.3E-01 | 0.96 | 7.1E-01 | 1.01 |                          |
| Rap guanine nucleotide exchange factor 6                                                  | RAPGEF6  | 51735  | 1.31E-03 | 1.45E-01 | 0.1 (0.0, 0.5)    | 1.4E-01 | 0.95 | 4.7E-05 | 0.82 |                          |
| RAS p21 protein activator 4                                                               | RASA4    | 10156  | 5.45E-04 | 1.04E-01 | 0.3 (0.2, 0.6)    | 6.0E-01 | 1.06 | 5.5E-02 | 0.75 |                          |
| Ras protein-specific guanine nucleotide-releasing factor 2                                | RASGRF2  | 5924   | 1.18E-04 | 5.05E-02 | 0.3 (0.1, 0.5)    | 2.6E-01 | 0.84 | 3.4E-04 | 0.54 |                          |
| RCAN family member 3                                                                      | RCAN3    | 11123  | 4.77E-04 | 9.87E-02 | 0.3 (0.2, 0.6)    | 5.5E-01 | 0.94 | 3.1E-02 | 0.73 |                          |
| reversion-inducing-cysteine-rich protein with kazal motifs                                | RECK     | 8434   | 1.59E-03 | 1.59E-01 | 0.3 (0.1, 0.6)    | 4.0E-01 | 0.93 | 7.5E-03 | 0.77 |                          |
| Rho GTPase activating protein 24                                                          | ARHGAP24 | 83478  | 1.99E-04 | 6.26E-02 | 2.8 (1.6, 4.9)    | 2.8E-01 | 0.76 | 2.0E-01 | 1.24 |                          |
| Rho guanine nucleotide exchange factor 7                                                  | ARHGEF7  | 8874   | 2.92E-04 | 7.75E-02 | 18.9 (4.8, 73.7)  | 3.3E-01 | 1.04 | 6.3E-01 | 1.06 |                          |
| Rho-related BTB domain containing 2                                                       | RHOBTB2  | 23221  | 1.11E-06 | 4.84E-03 | 5.0 (2.0, 12.8)   | 1.3E-01 | 1.04 | 2.8E-01 | 1.14 |                          |
| Rho-type GTPase-activating protein RICH2                                                  | RICH2    | 9912   | 6.81E-05 | 4.00E-02 | 5.2 (2.1, 12.5)   | 4.7E-01 | 1.03 | 6.8E-01 | 1.11 |                          |
| ribosome binding protein 1 homolog 180kDa                                                 | RRBP1    | 6238   | 1.93E-03 | 1.79E-01 | 11.7 (2.5, 55.6)  | 8.5E-01 | 0.99 | 6.0E-02 | 1.14 |                          |
| ring finger protein 144A                                                                  | RNF144A  | 9781   | 1.65E-03 | 1.63E-01 | 0.4 (0.2, 0.7)    | 1.8E-01 | 0.88 | 2.4E-04 | 0.67 |                          |
| SATB homeobox 1                                                                           | SATB1    | 6304   | 3.17E-04 | 8.09E-02 | 0.1 (0.0, 0.4)    | 4.6E-01 | 0.95 | 3.1E-04 | 0.74 |                          |
| sema domain, immunoglobulin domain, transmembrane domain and short cytoplasmic domain, 4C | SEMA4C   | 54910  | 1.02E-03 | 1.33E-01 | 0.2 (0.1, 0.5)    | 6.1E-02 | 0.88 | 1.8E-04 | 0.75 |                          |
| SET domain containing 8                                                                   | SETD8    | 387893 | 1.21E-03 | 1.40E-01 | 8.2 (2.2, 30.9)   | 3.9E-01 | 0.93 | 2.0E-01 | 1.12 |                          |
| sex comb on midleg-like 1                                                                 | SCML1    | 6322   | 1.23E-06 | 4.84E-03 | 0.4 (0.2, 0.6)    | 2.9E-01 | 0.86 | 1.2E-03 | 0.56 |                          |
| sex comb on midleg-like 4                                                                 | SCML4    | 256380 | 1.37E-03 | 1.48E-01 | 0.3 (0.2, 0.7)    | 3.6E-01 | 0.95 | 2.6E-02 | 0.86 |                          |
| SH3-domain binding protein 5                                                              | SH3BP5   | 9467   | 1.15E-03 | 1.37E-01 | 5.4 (2.0, 14.5)   | 7.8E-01 | 0.97 | 5.4E-01 | 1.09 |                          |
| signal-regulatory protein gamma                                                           | SIRPG    | 55423  | 6.80E-04 | 1.15E-01 | 0.2 (0.1, 0.5)    | 6.4E-01 | 0.96 | 3.7E-03 | 0.75 |                          |
| similar to protein immuno-reactive with anti-PTH polyclonal antibodies                    | FLJ40330 | 645784 | 1.75E-04 | 5.77E-02 | 2.3 (1.4, 3.8)    | 9.3E-01 | 0.86 | 8.8E-01 | 1.36 |                          |
| single-stranded DNA binding protein 2                                                     | SSBP2    | 23635  | 2.37E-03 | 1.95E-01 | 0.1 (0.0, 0.5)    | 6.6E-01 | 0.96 | 1.7E-01 | 0.90 |                          |
| SMAD family member 3                                                                      | SMAD3    | 4088   | 2.24E-03 | 1.92E-01 | 0.1 (0.0, 0.4)    | 5.4E-01 | 0.94 | 4.0E-01 | 0.95 | 6                        |

|                                                           |           |        |          |          |                     |         |      |         |      |         |
|-----------------------------------------------------------|-----------|--------|----------|----------|---------------------|---------|------|---------|------|---------|
| SMEK homolog 2, suppressor of mek1                        | SMEK2     | 57223  | 5.72E-04 | 1.04E-01 | 0.1 (0.0, 0.3)      | 5.1E-01 | 0.98 | 3.0E-01 | 0.96 |         |
| solute carrier family 25 member 15                        | SLC25A15  | 10166  | 9.35E-04 | 1.32E-01 | 0.1 (0.0, 0.4)      | 2.3E-01 | 0.92 | 8.3E-03 | 0.82 |         |
| Spleen tyrosine kinase                                    | SYK       | 6850   | 3.98E-05 | 3.24E-02 | 75.5 (10.2, 556.2)  | 6.5E-01 | 1.02 | 1.9E-02 | 1.13 | 2, 4, 7 |
| Src-like-adaptor 2                                        | SLA2      | 84174  | 7.79E-04 | 1.23E-01 | 0.2 (0.1, 0.5)      | 8.9E-02 | 0.87 | 7.4E-03 | 0.79 |         |
| suppressor of variegation 4-20 homolog 1                  | SUV420H1  | 51111  | 2.03E-03 | 1.84E-01 | 85.1 (6.9, 1,043.4) | 7.6E-01 | 1.01 | 7.1E-01 | 1.03 |         |
| T cell receptor alpha                                     | TRA@      | 6955   | 8.33E-04 | 1.26E-01 | 0.3 (0.1, 0.6)      | 5.0E-01 | 0.98 | 1.1E-04 | 0.61 | 1       |
| T cell receptor associated transmembrane adaptor 1        | TRAT1     | 50852  | 9.39E-04 | 1.32E-01 | 0.4 (0.2, 0.7)      | 6.6E-01 | 1.06 | 1.2E-01 | 0.80 |         |
| tandem C2 domains, nuclear                                | TC2N      | 123036 | 4.08E-04 | 9.00E-02 | 0.2 (0.1, 0.5)      | 7.3E-01 | 0.96 | 1.5E-03 | 0.69 |         |
| TBC1 domain family, member 4                              | TBC1D4    | 9882   | 6.45E-04 | 1.11E-01 | 0.4 (0.2, 0.7)      | 9.8E-01 | 1.00 | 5.8E-03 | 0.67 |         |
| TBC1 domain family, member 5                              | TBC1D5    | 9779   | 1.79E-03 | 1.72E-01 | 16.1 (3.7, 69.9)    | 6.7E-01 | 0.99 | 2.9E-01 | 1.11 |         |
| T-cell activation NFKB-like protein                       | TA-NFKBH  | 84807  | 2.34E-04 | 6.73E-02 | 7.0 (2.3, 20.8)     | 2.8E-01 | 1.05 | 4.6E-02 | 1.17 |         |
| Tetraspanin 18                                            | TSPAN18   | 90139  | 1.06E-03 | 1.36E-01 | 0.3 (0.2, 0.6)      | 7.6E-01 | 0.94 | 8.2E-02 | 0.78 |         |
| thioesterase superfamily member 4                         | THEM4     | 117145 | 1.20E-03 | 1.40E-01 | 0.2 (0.1, 0.6)      | 2.4E-01 | 0.89 | 3.2E-04 | 0.65 |         |
| TRAF2 and NCK interacting kinase                          | TNIK      | 23043  | 9.37E-04 | 1.32E-01 | 0.2 (0.1, 0.6)      | 3.5E-01 | 1.08 | 3.1E-01 | 0.90 |         |
| trafficking protein, kinesin binding 1                    | TRAK1     | 22906  | 2.11E-03 | 1.85E-01 | 3.1 (1.4, 7.1)      | 8.9E-01 | 1.01 | 3.4E-01 | 1.10 |         |
| transcription factor 3                                    | TCF3      | 6929   | 1.54E-03 | 1.56E-01 | 4.1 (1.7, 10.1)     | 6.6E-01 | 1.02 | 9.7E-01 | 1.05 |         |
| transcription factor 7                                    | TCF7      | 6932   | 8.99E-04 | 1.31E-01 | 0.5 (0.3, 0.7)      | 5.2E-01 | 0.82 | 1.0E-02 | 0.54 |         |
| transcription factor EB                                   | TFEB      | 7942   | 7.64E-05 | 4.05E-02 | 56.5 (7.0, 454.9)   | 7.6E-01 | 1.02 | 2.8E-02 | 1.16 |         |
| transketolase-like 1                                      | TKTL1     | 8277   | 7.13E-04 | 1.18E-01 | 0.3 (0.2, 0.6)      | 3.2E-01 | 0.70 | 7.7E-02 | 0.60 |         |
| transmembrane and immunoglobulin domain containing 2      | TMIGD2    | 126259 | 5.03E-04 | 1.00E-01 | 0.0 (0.0, 0.1)      | 1.1E-01 | 0.93 | 7.7E-02 | 0.93 |         |
| Transmembrane emp24 protein transport domain containing 8 | TMED8     | 283578 | 4.55E-04 | 9.56E-02 | 3.5 (1.7, 7.2)      | 7.8E-01 | 0.92 | 3.2E-02 | 1.27 |         |
| transmembrane protein 204                                 | TMEM204   | 79652  | 1.76E-04 | 5.77E-02 | 0.4 (0.2, 0.7)      | 5.2E-01 | 0.91 | 3.9E-03 | 0.65 |         |
| transmembrane protein 66                                  | TMEM66    | 51669  | 1.29E-03 | 1.45E-01 | 0.0 (0.0, 0.2)      | 2.0E-01 | 0.96 | 4.3E-04 | 0.87 |         |
| tribbles homolog 2                                        | TRIB2     | 28951  | 3.96E-04 | 9.00E-02 | 0.3 (0.1, 0.6)      | 6.7E-01 | 0.95 | 2.2E-03 | 0.69 |         |
| TSC22 domain family, member 1                             | TSC22D1   | 8848   | 2.30E-03 | 1.94E-01 | 0.3 (0.1, 0.6)      | 7.8E-01 | 0.99 | 1.2E-02 | 0.86 |         |
| tumor necrosis factor receptor superfamily, member 13B    | TNFRSF13B | 23495  | 2.08E-04 | 6.40E-02 | 19.9 (3.4, 115.6)   | 8.5E-01 | 1.01 | 9.6E-01 | 1.02 |         |
| tumor necrosis factor receptor superfamily, member 25     | TNFRSF25  | 8718   | 5.57E-04 | 1.04E-01 | 0.1 (0.0, 0.3)      | 3.6E-01 | 0.93 | 1.2E-02 | 0.83 |         |
| TXK tyrosine kinase                                       | TXK       | 7294   | 1.54E-03 | 1.56E-01 | 0.6 (0.4, 0.8)      | 3.7E-01 | 0.92 | 1.3E-03 | 0.61 | 1, 3    |
| ubiquitin associated and SH3 domain containing, B         | UBASH3B   | 84959  | 7.88E-04 | 1.23E-01 | 6.0 (2.1, 17.1)     | 3.8E-01 | 1.06 | 8.5E-02 | 1.20 |         |
| UDP-glucose ceramide glucosyltransferase-like 2           | UGCGL2    | 55757  | 2.50E-05 | 2.52E-02 | 26.5 (4.8, 145.9)   | 9.5E-01 | 1.00 | 1.9E-02 | 1.08 |         |

|                                               |         |        |          |          |                        |         |      |         |      |          |
|-----------------------------------------------|---------|--------|----------|----------|------------------------|---------|------|---------|------|----------|
| uncoupling protein 3                          | UCP3    | 7352   | 1.19E-03 | 1.40E-01 | 377.1 (14.1, 10,100.0) | 1.7E-01 | 1.03 | 1.6E-01 | 1.04 |          |
| v-myc myelocytomatosis viral oncogene homolog | MYC     | 4609   | 8.89E-04 | 1.31E-01 | 0.3 (0.2, 0.6)         | 8.3E-01 | 1.03 | 3.6E-01 | 0.90 | 5, 6, 10 |
| WAS protein family, member 2                  | WASF2   | 10163  | 1.24E-03 | 1.42E-01 | 127.5 (6.5, 2,514.9)   | 6.3E-01 | 1.02 | 8.1E-01 | 1.00 |          |
| WD repeat domain 91                           | WDR91   | 29062  | 1.08E-04 | 4.77E-02 | 7.6 (2.7, 21.4)        | 2.5E-02 | 0.85 | 8.4E-01 | 1.02 |          |
| zinc finger protein 793                       | ZNF793  | 390927 | 2.67E-04 | 7.52E-02 | 5.5 (2.1, 14.4)        | 5.6E-01 | 1.04 | 8.3E-03 | 1.25 |          |
| Zinc finger protein 80                        | ZNF80   | 7634   | 3.73E-04 | 8.75E-02 | 3.7 (1.7, 8.0)         | 4.5E-01 | 1.04 | 8.8E-01 | 1.11 |          |
| zinc finger, CCHC domain containing 14        | ZCCHC14 | 23174  | 6.88E-05 | 4.00E-02 | 0.4 (0.3, 0.7)         | 5.6E-02 | 0.89 | 8.1E-05 | 0.73 |          |
| zinc finger, DHHC-type containing 19          | ZDHHC19 | 131540 | 2.83E-06 | 7.50E-03 | 2.5 (1.6, 4.1)         | 4.4E-01 | 0.94 | 1.7E-01 | 1.43 |          |
| zinc finger, DHHC-type containing 21          | ZDHHC21 | 340481 | 1.88E-03 | 1.76E-01 | 3.5 (1.5, 8.1)         | 3.1E-01 | 1.05 | 1.6E-01 | 1.20 |          |

11

12 *hr.* hazard ratio; 1. T cell receptor signaling; 2. Fc Epsilon RI signaling; 3. Leukocyte extravasation signaling; 4. Natural killer cell

13 signaling; 5. Neuregulin signaling; 6. Cell cycle: G1/S; 7. B cell receptor signaling; 8. Glucocorticoid receptor signaling; 9. Synaptic long

14 term potentiation; 10. PDGF signaling; 11. Chemokin signalling
